# Supplementary material for: Water-compatible surface-imprinted microspheres for high adsorption and selective recognition of peptide drug from aqueous media
Source: Royal Society of Chemistry journal article supplement (doi:10.1039/c4tb02030h), 2015-01-01
Supplement: c4tb02030h1.pdf [file c4tb02030h1.pdf]

## Supplementary Information

### Water-compatible surface-imprinted microspheres for high adsorption and selective recognition of peptide drug from aqueous media

Chunbao Du,\* Xiaoling Hu, Ping Guan, Longxia Guo, Liwei Qian, Renyuan Song, Ji Li and Chaoli Wang

**Table S1** Recipe for the synthesis of imprinted microspheres (the obtained microspheres with different monomers or cross-linkers are marked)

| Experimental conditions |          | MIMs <sup>1</sup> | MIMs <sup>2</sup> | MIMs <sup>3</sup> | MIMs* | NIMs* |
|-------------------------|----------|-------------------|-------------------|-------------------|-------|-------|
| Monomer (mmol)          | AM       | 0                 | 0                 | 0                 | 1     | 1     |
|                         | EGDMA    | 2                 | 0                 | 0                 | 0     | 0     |
| Cross-linker (mmol)     | MBA      | 0                 | 2                 | 0                 | 0     | 0     |
|                         | [AVIM]Cl | 0                 | 0                 | 2                 | 4     | 4     |

**Table S2** Swelling behaviour of the microspheres

| Microspheres             | Monomers used in polymerization | SR (%) <sup>c</sup> |
|--------------------------|---------------------------------|---------------------|
| P(PEDMA-VI) <sup>a</sup> | PEGDMA: VI: EGDMA = 2: 1: 0.5   | 20                  |
| PEGMA-VI <sup>b</sup>    | PEGMA: VI: EGDMA = 2: 1: 0.5    | 150                 |

<sup>a</sup> The microspheres prepared in this work; <sup>b</sup> The microspheres prepared in the work of Uğuzdoğan et al.<sup>35</sup>; <sup>c</sup> Equilibrium SR was obtained after approximately 15–20 min.

**Table S3** Surface atomic compositions of the support microspheres from the XPS survey spectra

| Sample             | Elemental atomic composition (atomic %) |       |      |      |
|--------------------|-----------------------------------------|-------|------|------|
|                    | C                                       | O     | N    | Cl   |
| P(PEGDMA-VI)       | 68.50                                   | 25.78 | 5.81 | 0    |
| P(PEGDMA-VI)@IL(1) | 74.63                                   | 21.30 | 3.94 | 0.13 |
| P(PEGDMA-VI)@IL(2) | 75.47                                   | 21.05 | 3.33 | 0.15 |
| P(PEGDMA-VI)@IL(3) | 75.12                                   | 21.28 | 3.40 | 0.20 |
| P(PEGDMA-VI)@IL(4) | 75.43                                   | 20.98 | 3.36 | 0.23 |
